# Supplementary material
Source: Springer Nature journal article supplement (https://www.springermedizin.de/resource/supplementary/12885_2013_4381_MOESM3_ESM.pdf/9466122)

Spearman correlation= 0.79, P=0.006

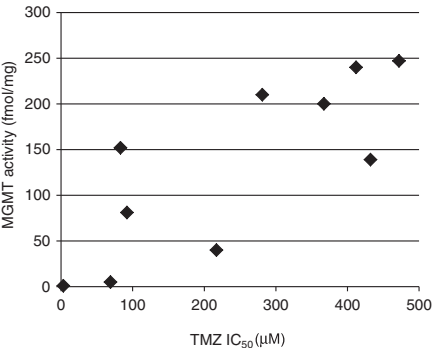

Spearman correlation= -0.79, P=0.01

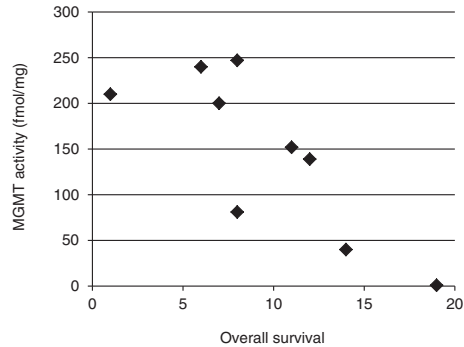

Spearman correlation= -0.85, P=0.003

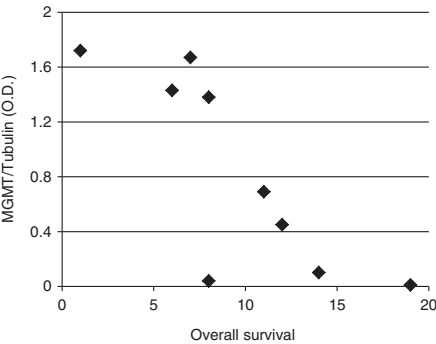

Spearman correlation= 0.71, P=0.02

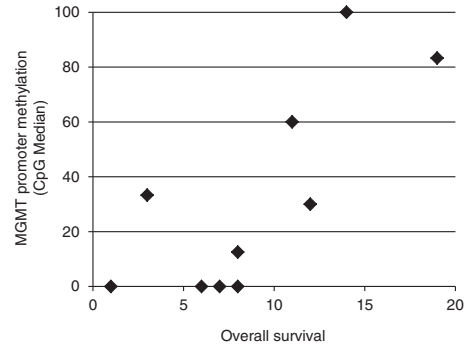

Supplement: MOESM3 [file 9466122]
